# Supplementary material for: Metabolic landscape of the healthy pancreas and pancreatic tumor microenvironment
Source: PubMed Central journal article supplement (PMC11457849; doi:10.1172/jci.insight.180114), 2024-08-13
Supplement: jciinsight-9-180114-s077.pdf [file jciinsight-9-180114-s077.pdf]

Supplemental Figure 1

A.

| Healthy     |             | Tumor       |             |
|-------------|-------------|-------------|-------------|
| Cell Type   | Cell Number | Cell Type   | Cell Number |
| Epithelial  | 7060        | Epithelial  | 9584        |
| CD8         | 1335        | CD8         | 3813        |
| CD4         | 1244        | CD4         | 5074        |
| Granulocyte | 349         | Granulocyte | 4859        |
| Acinar      | 17450       | Acinar      | 1290        |
| Macrophage  | 5844        | Macrophage  | 9085        |
| Fibroblast  | 2405        | Fibroblast  | 2434        |
| Endothelial | 3911        | Endothelial | 396         |
| B-Cells     | 1715        | B-Cells     | 1209        |
| Pericytes   | 1165        | Pericytes   | 813         |
| Mast        | 159         | Mast        | 1682        |
| Cycling     | 639         | Cycling     | 1005        |
| Plasma      | 90          | Plasma      | 1476        |
| NK          | 89          | NK          | 1089        |
| Endocrine   | 529         | Endocrine   | 18          |
| Dendritic   | 0           | Dendritic   | 127         |
| Neural      | 35          | Neural      | 43          |

B.

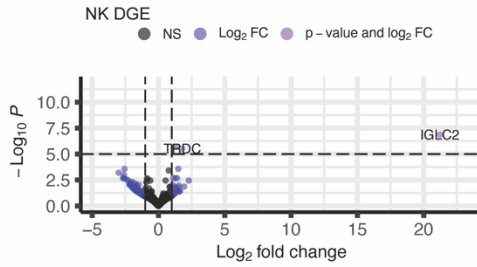

C.

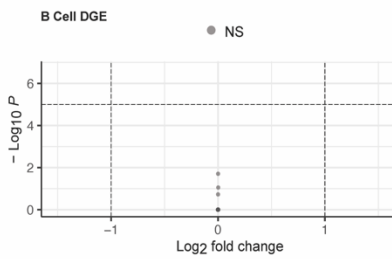

D.

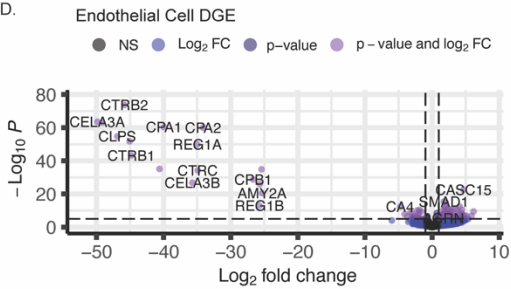

E.

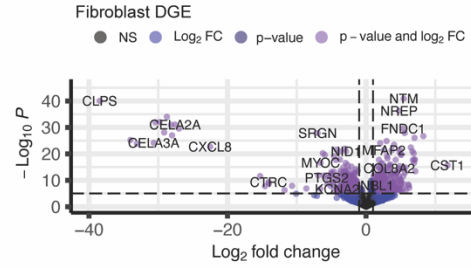

F.

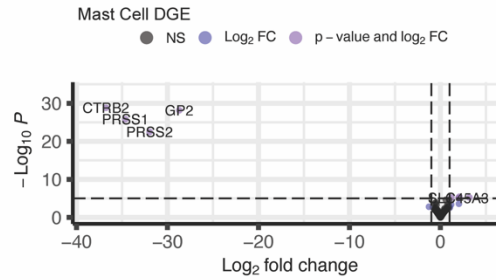

G.

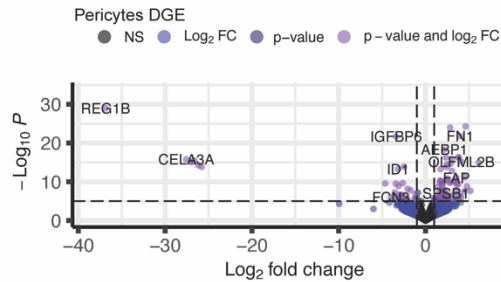

H.

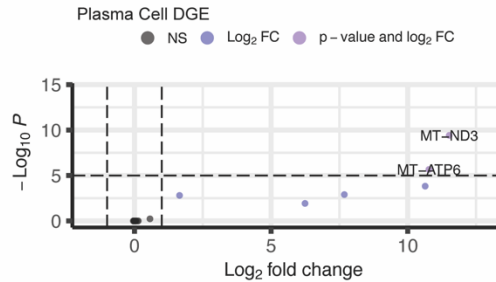

S2: (A) GSEA Enrichment plot of oxidative phosphorylation signature significantly increased in cancer cells, with corresponding NES and adjusted p-value.

Supplemental Figure 2

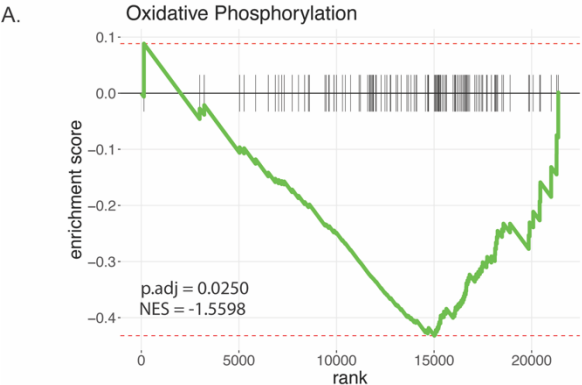

**S2: (A)** GSEA Enrichment plot of oxidative phosphorylation signature significantly increased in cancer cells, with corresponding NES and adjusted p-value.

Supplemental Figure 3

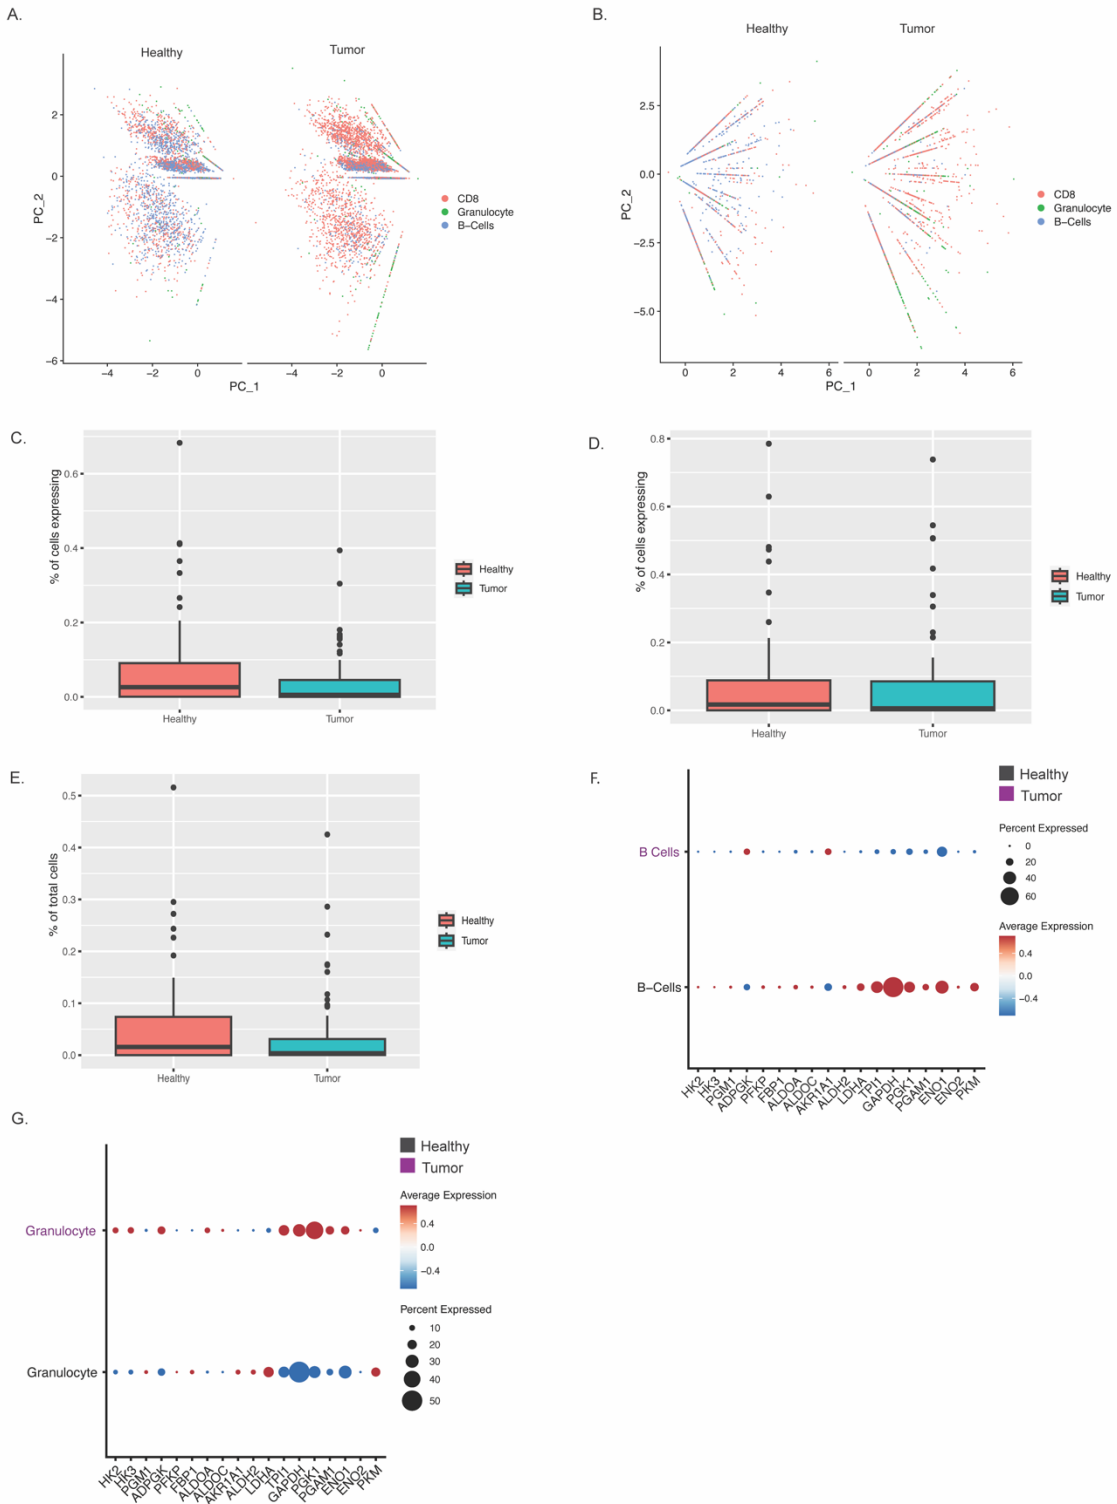

**S3:** (A) Principal Component Analysis (PCA) visualization based on the average expression and percent of cells expressing genes related to complex IV in B cells, granulocytes, and CD8+ T cells in healthy human and PDA samples. (B) PCA visualization based on the average expression and percent of cells expressing SDH/A/B/C/D in B cells, granulocytes, and CD8+ T cells in healthy human and PDA samples. (C-E) Box plots of reads corresponding to glycolytic genes in healthy and tumor conditions for B cells, CD8+ T cells, and granulocytes. (F-G) Dot Plot visualization of glycolytic genes, displaying average expression and percent expressed in B cells and granulocytes, respectively, in tumor (purple) and healthy pancreas tissue (black).

Supplemental Figure 4

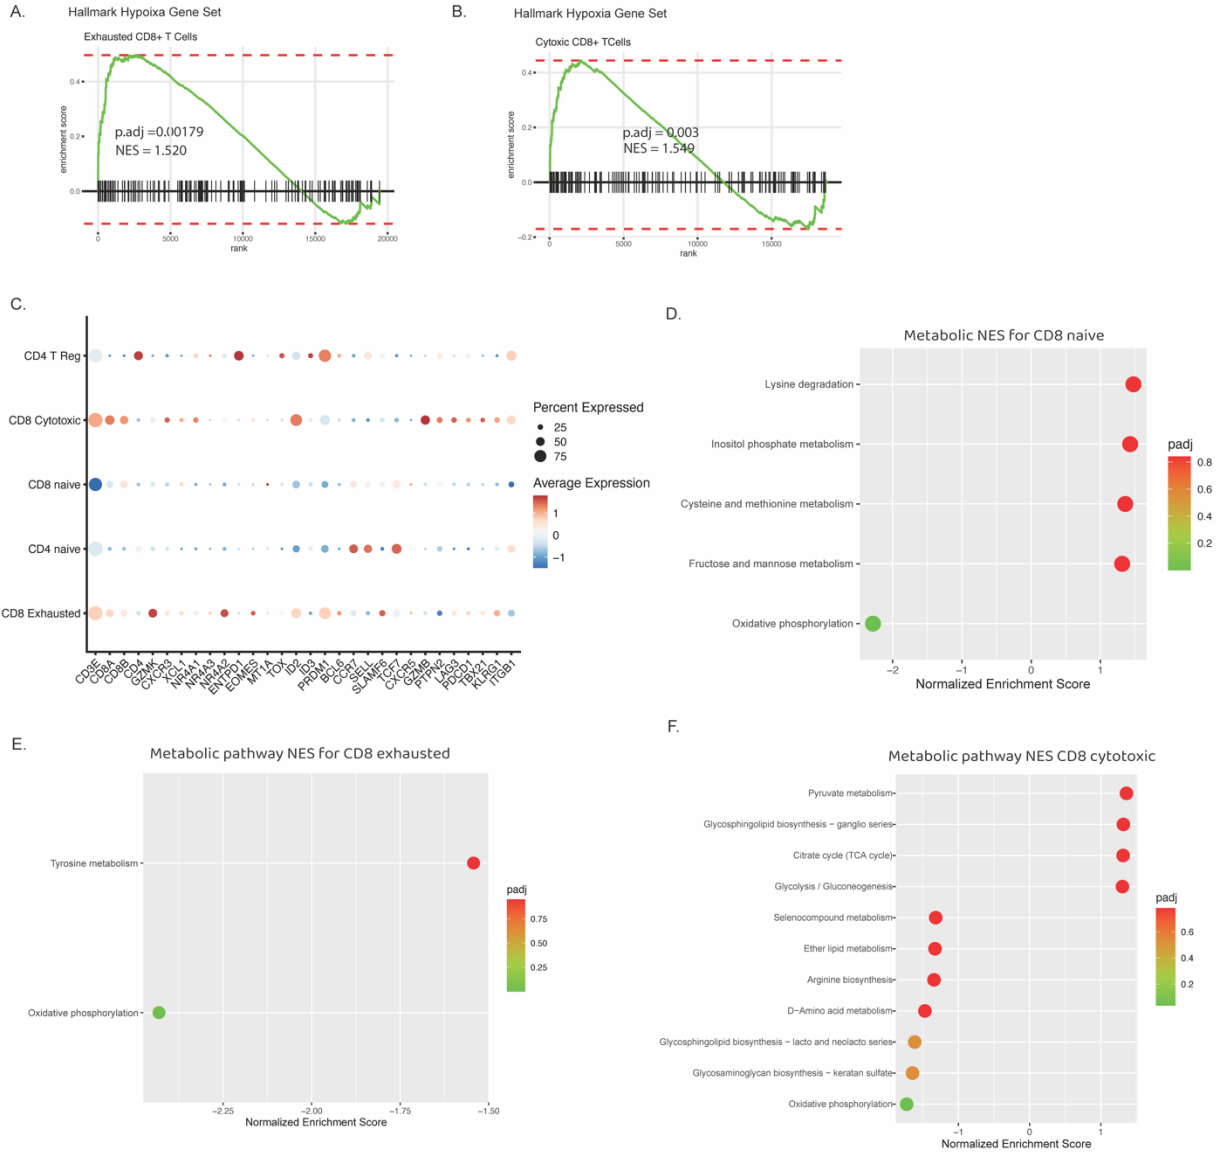

**S4: (A-B)** GSEA Enrichment plots demonstrating hypoxia is significantly downregulated in exhausted and cytotoxic CD8+ T cells in pancreatic cancer tissue compared to healthy counterpart. **(C)** Dot plot visualization of marker expression utilized to subset T cell populations. **(D-F)** GSEA results for CD8 naive, exhausted, and cytotoxic T cells from PDA samples compared to healthy samples, with corresponding normalized enrichment scores (NES) and adjusted p-values.

Supplemental Figure 5

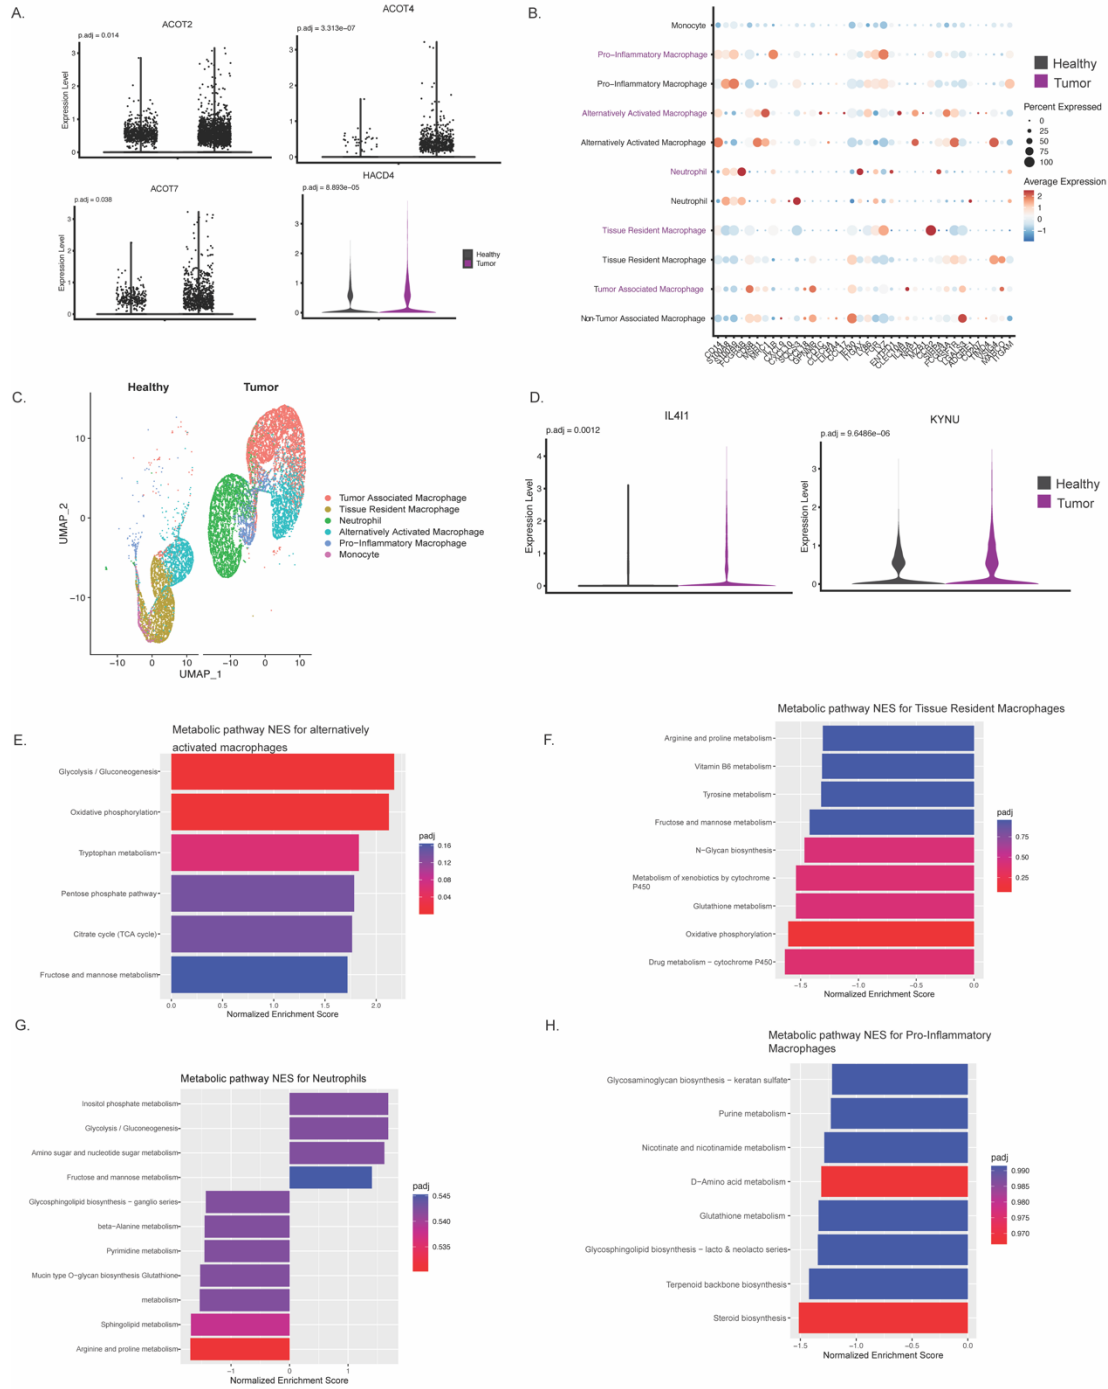

**S5:** (A) Violin plots of genes involved in unsaturated fatty acid synthesis, with adjusted p-values for significantly differentially expressed genes. (B) Dot Plot of markers used to identify sub populations of myeloid cells. (C) Uniform Manifold Approximation and Projection (UMAP) of myeloid populations in the healthy and tumor conditions. (D) Violin plots of differentially genes involved in tryptophan metabolism. (E) GSEA results for alternatively activated macrophages. (F) GSEA results for tissue resident macrophages. (G) GSEA analysis for neutrophils. (H) GSEA results for pro-inflammatory macrophages. All GSEA results contain corresponding normalized enrichment scores (NES) and adjusted p-values.

## Supplementary Figure Legends

**S1:** (A) Table with number of cells per population in the healthy and tumor samples. (B-H) Volcano plots of differential gene expression by cell type. Genes that are significantly up- (top-right) and down- regulated (top-left) in tumor versus healthy and the gene symbols are included for representative differentially expressed genes.

**S2:** (A) GSEA Enrichment plot of oxidative phosphorylation signature significantly increased in cancer cells, with corresponding NES and adjusted p-value.

**S3:** (A) Principal Component Analysis (PCA) visualization based on the average expression and percent of cells expressing genes related to complex IV in B cells, granulocytes, and CD8+ T cells in healthy human and PDA samples. (B) PCA visualization based on the average expression and percent of cells expressing SDH/A/B/C/D in B cells, granulocytes, and CD8+ T cells in healthy human and PDA samples. (C-E) Box plots of reads corresponding to glycolytic genes in healthy and tumor conditions for B cells, CD8+ T cells, and granulocytes. (F-G) Dot Plot visualization of glycolytic genes, displaying average expression and percent expressed in B cells and granulocytes, respectively, in tumor (purple) and healthy pancreas tissue (black).

**S4:** (A-B) GSEA Enrichment plots demonstrating hypoxia is significantly downregulated in exhausted and cytotoxic CD8+ T cells in pancreatic cancer tissue compared to healthy counterpart. (C) Dot plot visualization of marker expression utilized to subset T cell populations. (D-F) GSEA results for CD8 naïve, exhausted, and cytotoxic T cells from PDA samples compared to healthy samples, with corresponding normalized enrichment scores (NES) and adjusted p-values.

**S5:** (A) Violin plots of genes involved in unsaturated fatty acid synthesis, with adjusted p-values for significantly differentially expressed genes. (B) Dot Plot of markers used to identify sub populations of myeloid cells. (C) Uniform Manifold Approximation and Projection (UMAP) of myeloid populations in the healthy and tumor conditions. (D) Violin plots of differentially genes involved in tryptophan metabolism. E, GSEA results for alternatively activated macrophages. (F) GSEA results for tissue resident macrophages. (G) GSEA analysis for neutrophils. (H) GSEA results for pro-inflammatory macrophages. All GSEA results contain corresponding normalized enrichment scores (NES) and adjusted p-values.
