# Supplementary material for: Metabolic landscape of the healthy pancreas and pancreatic tumor microenvironment
Source: PubMed Central journal article supplement (PMC11457849; doi:10.1172/jci.insight.180114), 2024-08-13
Supplement: jciinsight-9-180114-s079.pdf [file jciinsight-9-180114-s079.pdf]

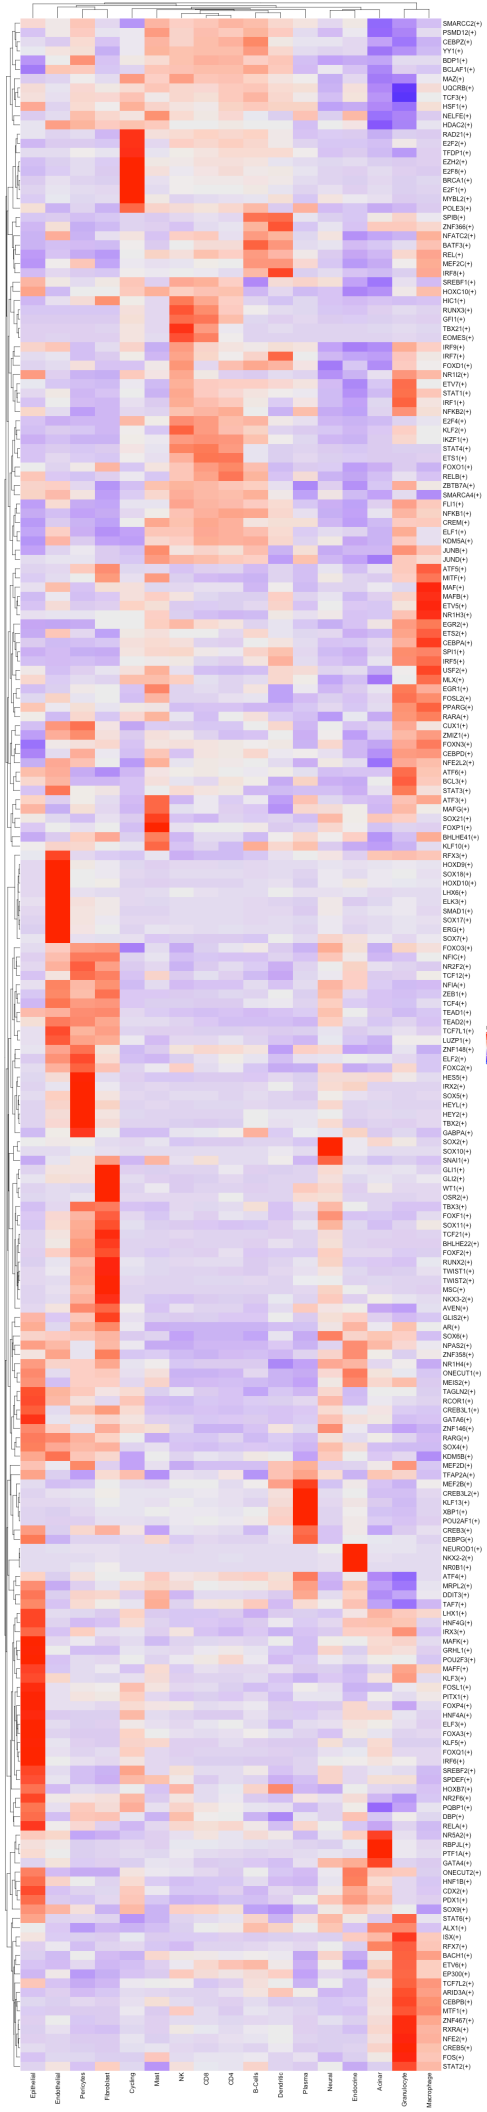

log2 gene activity

- SMARCC2(+)
- PSMD2(+)
- CEBPZ(+)
- YY1(+)
- EP300(+)
- BCLAF1(+)
- MAD2(+)
- UQCRB(+)
- TGF3(+)
- HIF1(+)
- HELF3(+)
- HMOX2(+)
- RAD21(+)
- CFP1(+)
- TFPI(+)
- EDH2(+)
- E2F3(+)
- BRCA1(+)
- EP300(+)
- MYBL2(+)
- FOXP2(+)
- SPBL1(+)
- ZNF368(+)
- NFATC2(+)
- BATF3(+)
- RELB(+)
- MEF2C(+)
- IRF1(+)
- SREBF1(+)
- HMOX1(+)
- HIC1(+)
- RUNX3(+)
- GPI1(+)
- TBC1(+)
- EDMER3(+)
- IRF1(+)
- RFT1(+)
- FOXO1(+)
- NR1H2(+)
- ETV1(+)
- STAT1(+)
- IRF1(+)
- NFIB(+)
- E2F4(+)
- NF1(+)
- KZF1(+)
- STAT4(+)
- ETS1(+)
- FOXO1(+)
- RELB(+)
- ZBTB7A(+)
- SMARCA4(+)
- FLI1(+)
- IRF1(+)
- CREB1(+)
- ELF1(+)
- KOM5A(+)
- JUNB(+)
- JUNB(+)
- ATF3(+)
- MYB(+)
- MAF(+)
- MAF(+)
- MYB(+)
- MYB(+)
- NR1H3(+)
- EP300(+)
- ETS2(+)
- CEBP4(+)
- SP1(+)
- IRF5(+)
- IRF5(+)
- MLK2(+)
- SOX1(+)
- FOSL2(+)
- PPARG(+)
- RARG(+)
- CLK1(+)
- DNCE1(+)
- FOXN3(+)
- CEBPB(+)
- NFESL1(+)
- ATF4(+)
- BCL11(+)
- STAT3(+)
- ATF3(+)
- MAF(+)
- SOX2(+)
- FOXO1(+)
- BHLHE40(+)
- NF1(+)
- REX1(+)
- HMOX2(+)
- SOX18(+)
- HMOX1(+)
- LMNB1(+)
- ELK3(+)
- SMAD3(+)
- SOX11(+)
- ERG(+)
- SOX1(+)
- FOXO3(+)
- NF1(+)
- NF1(+)
- NF1(+)
- ZEB1(+)
- TGF1(+)
- TEAD1(+)
- TEAD1(+)
- TCF7L1(+)
- LUT1(+)
- ZNF148(+)
- ELF2(+)
- FOXO3(+)
- HES1(+)
- IRF2(+)
- SOX3(+)
- HEY1(+)
- HEY2(+)
- TBXL1(+)
- CAMP1(+)
- SOX1(+)
- SOX1(+)
- SOX1(+)
- SNM1(+)
- GLI1(+)
- GLI1(+)
- WT1(+)
- CREB1(+)
- TBXL1(+)
- FOXP1(+)
- SOX11(+)
- TOP2(+)
- BRHE3A(+)
- FOXF2(+)
- RUNX2(+)
- TWIST1(+)
- TWIST2(+)
- MSC1(+)
- NKX2-2(+)
- ATF4(+)
- GLIS2(+)
- IRX1(+)
- SOX6(+)
- IRFAP2(+)
- ZNF594(+)
- NR1H3(+)
- CREB3L1(+)
- MEIS2(+)
- TAGLN(+)
- RCOR1(+)
- CREB3L1(+)
- GATA6(+)
- ZNF146(+)
- BARF1(+)
- SOX4(+)
- KOM5B(+)
- MEF2D(+)
- TAF12A(+)
- MEF1B(+)
- CREB3L2(+)
- NF1(+)
- XBP1(+)
- FOXP1(+)
- CREB3(+)
- CEBPD(+)
- NEUROD1(+)
- NKX2-2(+)
- NR1H3(+)
- ATF4(+)
- IRFAP2(+)
- DDIT3(+)
- TAF1(+)
- LUX1(+)
- IRF4G(+)
- IRF4(+)
- MAFK1(+)
- GRN1(+)
- FOXP2(+)
- MAFK1(+)
- NF1(+)
- FOSL1(+)
- PTX1(+)
- FOXP4(+)
- IRF5A(+)
- ELF1(+)
- FOXP3(+)
- NF1(+)
- FOXO1(+)
- IRF1(+)
- SREBF2(+)
- SPDEF(+)
- HNF1B(+)
- NR2F6(+)
- IRF1(+)
- DBP(+)
- RELB(+)
- NKX2-1(+)
- RBP1(+)
- PTF1A(+)
- GATA1(+)
- ONECUT2(+)
- HNF1B(+)
- CDX1(+)
- FOXP1(+)
- SOX9(+)
- STAT5(+)
- ALX1(+)
- SOX1(+)
- REX1(+)
- BACH1(+)
- ETV1(+)
- EP300(+)
- TGF1(+)
- ARID3A(+)
- CEBPB(+)
- MIF1(+)
- ZNF407(+)
- RFX4(+)
- NFE2L3(+)
- CREB1(+)
- FOS(+)
- STAT2(+)
