# Supplementary material for: Metabolic landscape of the healthy pancreas and pancreatic tumor microenvironment
Source: PubMed Central journal article supplement (PMC11457849; doi:10.1172/jci.insight.180114), 2024-08-13
Supplement: jciinsight-9-180114-s081.pdf [file jciinsight-9-180114-s081.pdf]

Full unedited blot for **Figure 5D**

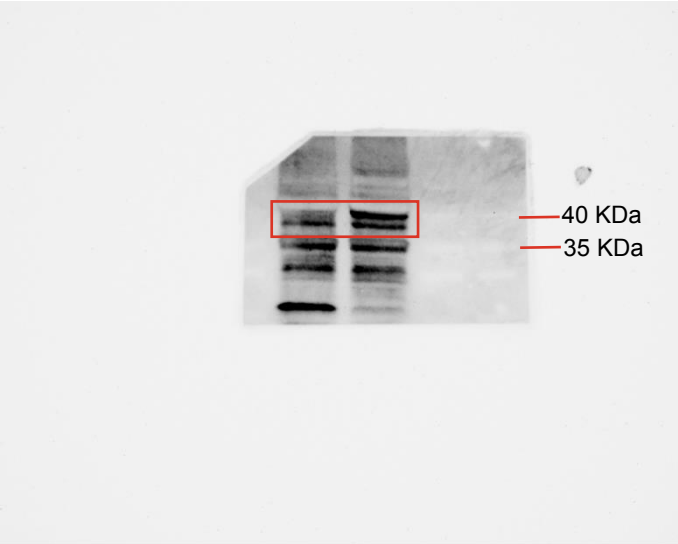

**SCD**

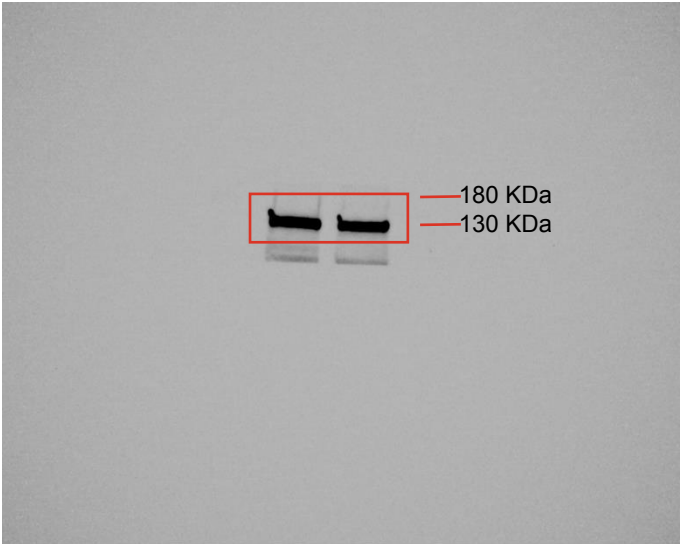

**Vinculin**

Full unedited blot for **Figure 6D**

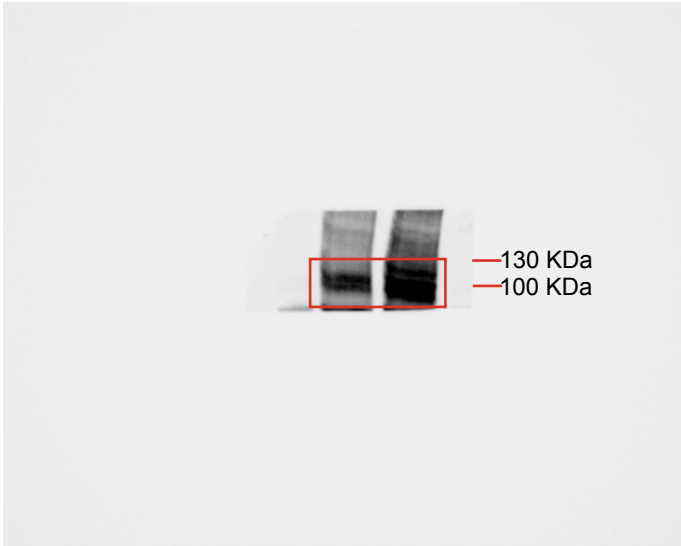

**ABCG1**

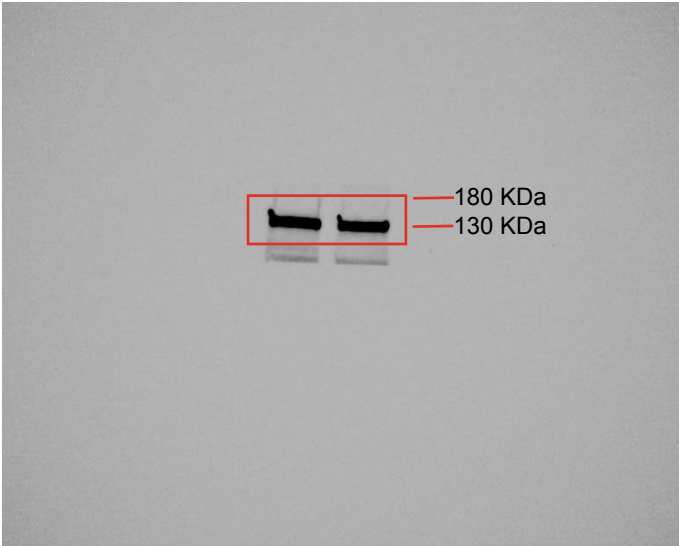

**Vinculin**
